# Supplementary material for: Psychometric Evaluation of the School Climate and School Identification Measure—Student on Chilean Students: A Bifactor Model Approach
Source: MDPI journal article supplement (doi:10.3390/children11010087), 2024-01-11
Supplement: s1 [file s1]

Table S1. Items in the original English version of SCASIM-ST and their adapted version in Spanish.

|                                                                                                                                                                                                     |
|-----------------------------------------------------------------------------------------------------------------------------------------------------------------------------------------------------|
| Student-student relationships / Relaciones estudiante-estudiante                                                                                                                                    |
| it1 Students care about each other / Los estudiantes se cuidan unos a otros                                                                                                                         |
| it2 Students are friendly to each other / Los estudiantes son amigables entre si                                                                                                                    |
| it3 Students go out of their way to help each other / Los estudiantes buscan la forma de ayudarse unos a otros                                                                                      |
| it4 Students treat each other with respect / Los estudiantes se tratan con respeto entre si                                                                                                         |
| it5 Students are fair to each other / Los estudiantes son justos entre sí                                                                                                                           |
| it6 Students show understanding to each other / Los estudiantes muestran comprensión entre ellos                                                                                                    |
| it7 Students are accepting of each others' differences / Los estudiantes aceptan diferencias de los demás                                                                                           |
| Student-staff relationships / Relaciones estudiantes-personal                                                                                                                                       |
| it8 Staff care about students / El personal cuida a los estudiantes                                                                                                                                 |
| it9 Staff are friendly to students / El personal es amigable con los estudiantes                                                                                                                    |
| it10 Staff go out of their way to help students / El personal busca formas de ayudar a los estudiantes                                                                                              |
| it11 Staff treat students with respect / El personal trata a los estudiantes con respeto                                                                                                            |
| it12 Staff listen to what students have to say most of the time / El personal escucha lo que los estudiantes tienen que decir la mayoría del tiempo                                                 |
| it13 Staff involve students in decisions and planning / El personal involucra a los estudiantes en las decisiones y planificación                                                                   |
| it14 Staff are fair in their dealing with students / El personal es justo en su trato con los estudiantes                                                                                           |
| it15 Staff show understanding to students / El personal muestra comprensión a los estudiantes                                                                                                       |
| it16 Staff take students' concerns seriously / El personal toma en serio las preocupaciones de los estudiantes                                                                                      |
| Academic emphasis / Énfasis académico                                                                                                                                                               |
| it17 Teachers encourage students to try out new ideas (think independently) / Los profesores animan a los estudiantes a probar nuevas ideas Pensar independientemente)                              |
| it18 Teachers challenge students to do better / Los profesores desafían a los estudiantes a hacerlo mejor                                                                                           |
| it19 Teachers are willing to give students extra help on school work if needed / Los profesores están dispuestos a dar una ayuda extra en el trabajo escolar si es necesario                        |
| it20 Teachers set high standards for learning in their classes / Los profesores establecen altos estándares de aprendizaje en sus clases                                                            |
| it21 Teachers expect everyone to work hard / Los profesores esperan que todos trabajen mucho                                                                                                        |
| it22 Teachers want every student to do their best / Los profesores quieren que cada estudiante haga su mejor esfuerzo                                                                               |
| it23 Teachers believe that every student can be a success / Los profesores creen que cada estudiante puede ser un éxito                                                                             |
| it24 Teachers give useful feedback / Los profesores dan una retroalimentación útil                                                                                                                  |
| Shared values and approach / Valores y enfoques compartidos                                                                                                                                         |
| it25 Students and staff are working towards the same goals/ Los estudiantes y el personal luchan por los mismos objetivos                                                                           |
| it26 There is a sense that we are all on the same team / Hay un sentido de pertenencia y que todos estamos en el mismo equipo                                                                       |
| it27 There is school spirit and pride / Hay espíritu y orgullo escolar                                                                                                                              |
| it28 The school values and goals are well understood / Los valores y objetivos de la escuela son bien entendidos                                                                                    |
| it29 New students and staff are made to feel welcome as part of the group / Los nuevos estudiantes y personal son hechos sentir bienvenidos como parte del grupo                                    |
| it30 Student and staff who uphold the values of the school are recognized and celebrated / El estudiante y personal que defiende los valores de la escuela son reconocidos y celebrados             |
| it31 The expectations and rules are clear / Las expectativas y reglas son claras                                                                                                                    |
| it32 The rules related to discipline are clear and well-understood by staff and students / Las reglas relacionadas con la disciplina son claras y bien entendidas por el personal y los estudiantes |
| School identification / Identificación escolar                                                                                                                                                      |

it33 Being a part of this school is important to me / Ser parte de esta escuela es importante para mi

it34 I am happy to be a part of this school / Soy feliz de ser parte de esta escuela

it35 I feel a strong connection with this school / Siento una fuerte conexión con esta escuela

it36 I identify with this school / Me identifico con esta escuela

it37 I feel I belong at this school / Siento que pertenezco a esta escuela

it38 I care about this school / Cuido a esta escuela

---

Response scale 1 = strongly disagree; 2 = in disagreement; 3 = neither agree nor disagree; 4 = agree; 5 = totally agree

Escala de respuesta 1 = totalmente en desacuerdo; 2 = en desacuerdo; 3 = ni de acuerdo. ni en desacuerdo; 4 = de acuerdo; 5 = totalmente de acuerdo

Table S2. Estimates under the bifactor model of factor loadings. Standard Errors. Z and p value.

| Factor  | Estimate | Standard Error | Est./S.E | p value |
|---------|----------|----------------|----------|---------|
| SSR     |          |                |          |         |
| Item1   | 0.530    | 0.016          | 32.645   | <0.001  |
| Item2   | 0.599    | 0.015          | 38.669   | <0.001  |
| Item3   | 0.542    | 0.016          | 33.549   | <0.001  |
| Item4   | 0.580    | 0.015          | 38.446   | <0.001  |
| Item5   | 0.587    | 0.015          | 38.760   | <0.001  |
| Item6   | 0.596    | 0.015          | 40.323   | <0.001  |
| Item7   | 0.482    | 0.018          | 27.169   | <0.001  |
| SStaffR |          |                |          |         |
| Item8   | 0.361    | 0.020          | 18.369   | <0.001  |
| Item9   | 0.453    | 0.019          | 23.457   | <0.001  |
| Item10  | 0.427    | 0.018          | 23.823   | <0.001  |
| Item11  | 0.469    | 0.018          | 25.410   | <0.001  |
| Item12  | 0.421    | 0.018          | 23.685   | <0.001  |
| Item13  | 0.290    | 0.021          | 13.898   | <0.001  |
| Item14  | 0.395    | 0.017          | 22.550   | <0.001  |
| Item15  | 0.433    | 0.017          | 25.455   | <0.001  |
| Item16  | 0.385    | 0.017          | 22.160   | <0.001  |
| AE      |          |                |          |         |
| Item17  | 0.392    | 0.018          | 21.274   | <0.001  |
| Item18  | 0.447    | 0.018          | 24.430   | <0.001  |
| Item19  | 0.389    | 0.020          | 19.117   | <0.001  |
| Item20  | 0.369    | 0.020          | 18.314   | <0.001  |
| Item21  | 0.486    | 0.019          | 25.254   | <0.001  |
| Item22  | 0.529    | 0.018          | 29.183   | <0.001  |
| Item23  | 0.416    | 0.017          | 24.352   | <0.001  |
| Item24  | 0.349    | 0.020          | 17.429   | <0.001  |
| SVA     |          |                |          |         |
| Item25  | 0.105    | 0.023          | 4.493    | <0.001  |
| Item26  | 0.196    | 0.022          | 8.971    | <0.001  |
| Item27  | 0.245    | 0.022          | 11.235   | <0.001  |
| Item28  | 0.360    | 0.021          | 16.796   | <0.001  |
| Item29  | 0.176    | 0.024          | 7.432    | <0.001  |
| Item30  | 0.260    | 0.025          | 10.554   | <0.001  |
| Item31  | 0.387    | 0.021          | 18.128   | <0.001  |
| Item32  | 0.424    | 0.022          | 19.106   | <0.001  |
| SI      |          |                |          |         |
| Item33  | 0.540    | 0.015          | 36.968   | <0.001  |
| Item34  | 0.563    | 0.014          | 39.769   | <0.001  |
| Item35  | 0.645    | 0.014          | 47.333   | <0.001  |
| Item36  | 0.648    | 0.013          | 48.271   | <0.001  |
| Item37  | 0.601    | 0.014          | 44.214   | <0.001  |
| Item38  | 0.264    | 0.021          | 12.709   | <0.001  |
| SC      |          |                |          |         |
| Item1   | 0.586    | 0.017          | 35.430   | <0.001  |
| Item2   | 0.557    | 0.018          | 31.492   | <0.001  |
| Item3   | 0.573    | 0.017          | 33.619   | <0.001  |
| Item4   | 0.547    | 0.018          | 31.259   | <0.001  |
| Item5   | 0.594    | 0.016          | 37.204   | <0.001  |
| Item6   | 0.592    | 0.017          | 35.655   | <0.001  |
| Item7   | 0.538    | 0.018          | 29.846   | <0.001  |

|        |       |       |        |        |
|--------|-------|-------|--------|--------|
| Item8  | 0.763 | 0.013 | 59.396 | <0.001 |
| Item9  | 0.709 | 0.015 | 48.053 | <0.001 |
| Item10 | 0.763 | 0.012 | 61.092 | <0.001 |
| Item11 | 0.735 | 0.014 | 51.429 | <0.001 |
| Item12 | 0.729 | 0.013 | 56.077 | <0.001 |
| Item13 | 0.667 | 0.015 | 45.928 | <0.001 |
| Item14 | 0.783 | 0.011 | 69.810 | <0.001 |
| Item15 | 0.790 | 0.011 | 72.359 | <0.001 |
| Item16 | 0.790 | 0.011 | 71.535 | <0.001 |
| Item17 | 0.730 | 0.013 | 57.858 | <0.001 |
| Item18 | 0.716 | 0.013 | 53.957 | <0.001 |
| Item19 | 0.667 | 0.015 | 45.852 | <0.001 |
| Item20 | 0.692 | 0.014 | 47.972 | <0.001 |
| Item21 | 0.587 | 0.017 | 34.488 | <0.001 |
| Item22 | 0.714 | 0.014 | 49.586 | <0.001 |
| Item23 | 0.733 | 0.013 | 56.622 | <0.001 |
| Item24 | 0.720 | 0.013 | 55.246 | <0.001 |
| Item25 | 0.741 | 0.013 | 57.130 | <0.001 |
| Item26 | 0.776 | 0.011 | 71.006 | <0.001 |
| Item27 | 0.779 | 0.011 | 70.378 | <0.001 |
| Item28 | 0.742 | 0.012 | 60.282 | <0.001 |
| Item29 | 0.749 | 0.012 | 60.427 | <0.001 |
| Item30 | 0.581 | 0.017 | 35.044 | <0.001 |
| Item31 | 0.759 | 0.012 | 63.154 | <0.001 |
| Item32 | 0.721 | 0.013 | 54.526 | <0.001 |
| Item33 | 0.707 | 0.013 | 53.816 | <0.001 |
| Item34 | 0.724 | 0.013 | 55.968 | <0.001 |
| Item35 | 0.642 | 0.015 | 42.773 | <0.001 |
| Item36 | 0.657 | 0.014 | 46.062 | <0.001 |
| Item37 | 0.658 | 0.014 | 46.603 | <0.001 |
| Item38 | 0.621 | 0.017 | 37.152 | <0.001 |

---

Table S3. Estimates under the second-order model of factor loadings. Standard Errors. Z and p value.

| Factor                 | Estimate | Standard Error | Est./S.E | p value |
|------------------------|----------|----------------|----------|---------|
| SSR                    |          |                |          |         |
| Item1                  | 0.807    | 0.012          | 67.028   | <0.001  |
| Item2                  | 0.799    | 0.012          | 68.349   | <0.001  |
| Item3                  | 0.797    | 0.012          | 66.187   | <0.001  |
| Item4                  | 0.782    | 0.012          | 63.613   | <0.001  |
| Item5                  | 0.835    | 0.011          | 78.921   | <0.001  |
| Item6                  | 0.835    | 0.011          | 77.760   | <0.001  |
| Item7                  | 0.741    | 0.014          | 53.364   | <0.001  |
| SStaffR                |          |                |          |         |
| Item8                  | 0.855    | 0.009          | 98.222   | <0.001  |
| Item9                  | 0.824    | 0.010          | 82.033   | <0.001  |
| Item10                 | 0.871    | 0.008          | 115.366  | <0.001  |
| Item11                 | 0.855    | 0.009          | 91.982   | <0.001  |
| Item12                 | 0.835    | 0.009          | 96.632   | <0.001  |
| Item13                 | 0.742    | 0.012          | 61.616   | <0.001  |
| Item14                 | 0.883    | 0.007          | 128.135  | <0.001  |
| Item15                 | 0.898    | 0.006          | 148.533  | <0.001  |
| Item16                 | 0.887    | 0.007          | 135.586  | <0.001  |
| AE                     |          |                |          |         |
| Item17                 | 0.843    | 0.009          | 93.483   | <0.001  |
| Item18                 | 0.839    | 0.009          | 91.021   | <0.001  |
| Item19                 | 0.776    | 0.011          | 68.101   | <0.001  |
| Item20                 | 0.799    | 0.011          | 69.533   | <0.001  |
| Item21                 | 0.713    | 0.014          | 51.758   | <0.001  |
| Item22                 | 0.856    | 0.009          | 94.240   | <0.001  |
| Item23                 | 0.851    | 0.009          | 90.244   | <0.001  |
| Item24                 | 0.824    | 0.010          | 81.608   | <0.001  |
| SVA                    |          |                |          |         |
| Item25                 | 0.773    | 0.012          | 64.326   | <0.001  |
| Item26                 | 0.818    | 0.009          | 87.199   | <0.001  |
| Item27                 | 0.827    | 0.009          | 90.807   | <0.001  |
| Item28                 | 0.802    | 0.010          | 83.220   | <0.001  |
| Item29                 | 0.788    | 0.011          | 72.699   | <0.001  |
| Item30                 | 0.626    | 0.015          | 40.927   | <0.001  |
| Item31                 | 0.826    | 0.009          | 88.556   | <0.001  |
| Item32                 | 0.791    | 0.010          | 76.475   | <0.001  |
| SI                     |          |                |          |         |
| Item33                 | 0.901    | 0.006          | 148.376  | <0.001  |
| Item34                 | 0.927    | 0.006          | 161.667  | <0.001  |
| Item35                 | 0.887    | 0.006          | 140.827  | <0.001  |
| Item36                 | 0.904    | 0.005          | 166.575  | <0.001  |
| Item37                 | 0.881    | 0.006          | 136.269  | <0.001  |
| Item38                 | 0.743    | 0.015          | 48.423   | <0.001  |
| SC                     |          |                |          |         |
| SSRR                   | 0.713    | 0.014          | 52.153   | <0.001  |
| SStaffR                | 0.881    | 0.008          | 108.587  | <0.001  |
| AE                     | 0.856    | 0.009          | 92.466   | <0.001  |
| SVA                    | 0.934    | 0.006          | 158.673  | <0.001  |
| Correlation SC with SI | Estimate | Standard Error | Est./S.E | p value |
| SC                     |          |                |          |         |
| SI                     | 0.763    | 0.011          | 68.504   | <0.001  |
